# Supplementary material for: Differential nuclear scaffold/matrix attachment marks expressed genes
Source: PubMed Central journal article supplement — Hum Mol Genet. 2008 Nov 18;18(4):645–54. doi: 10.1093/hmg/ddn394 (PMC2638830; doi:10.1093/hmg/ddn394), 2008-11-18
Supplement: ddn394_1.pdf [file ddn394_1.pdf]

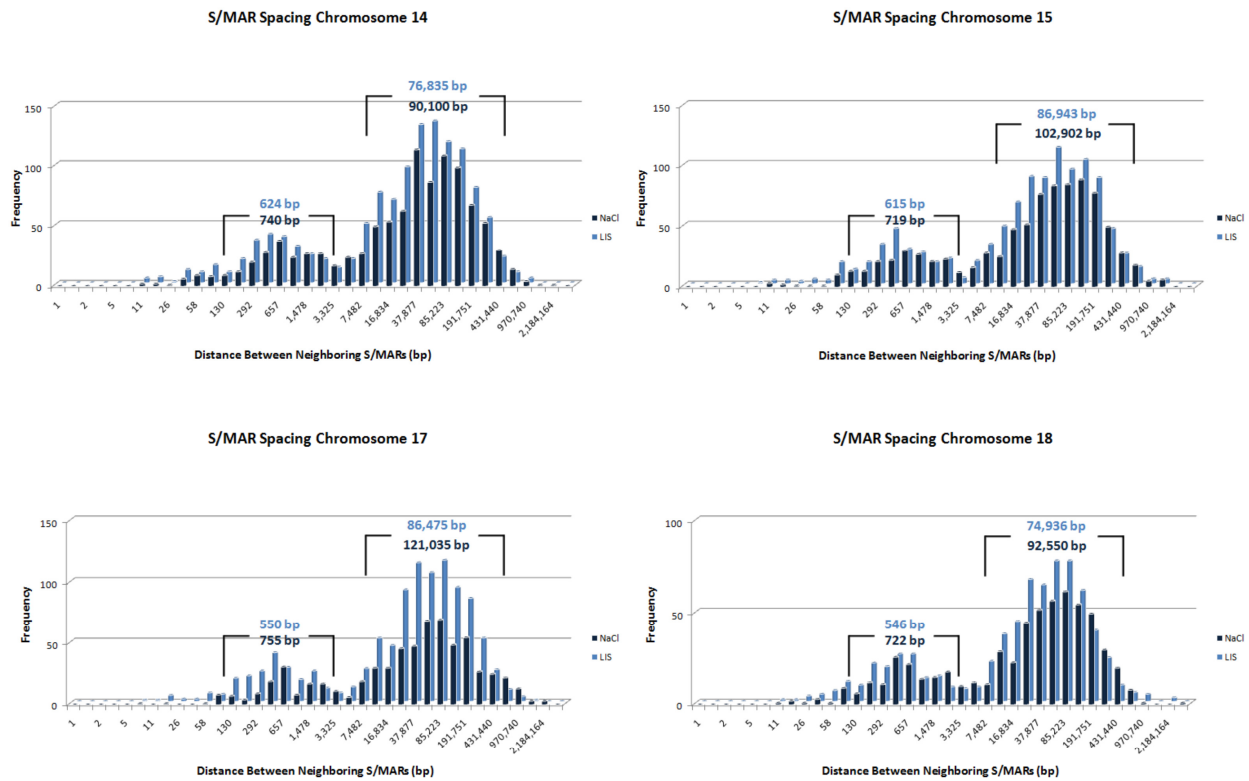

**Supplemental Figure 1. Spacing of S/MARs along human chromosomes 14, 15, 17 and 18.** The binned distance between S/MARs is shown for nuclear scaffolds/matrices isolated by LIS (light blue) or NaCl (dark blue) extraction with the peak distance frequency for each indicated and averages of each given.

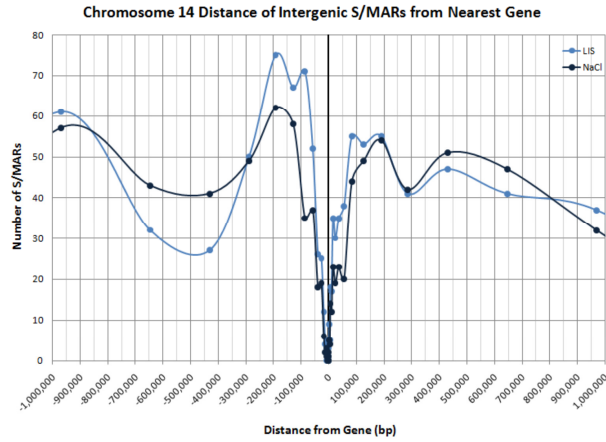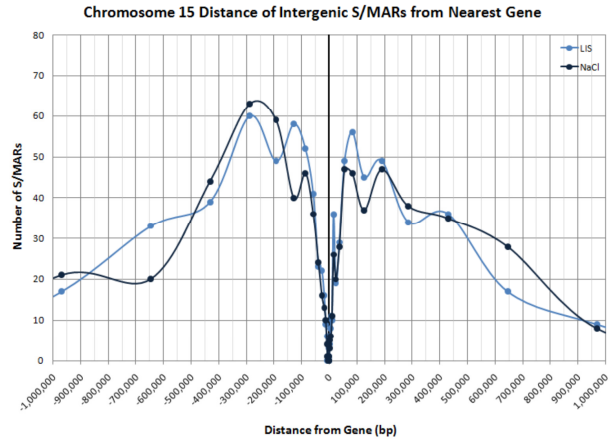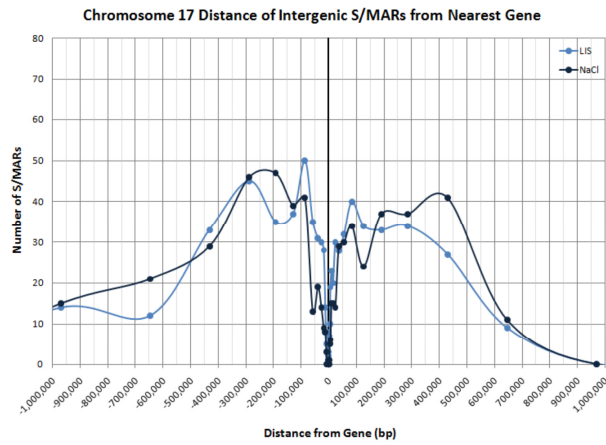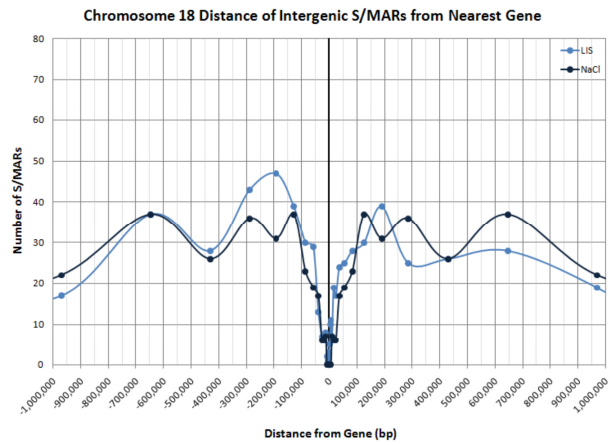

**Supplemental Figure 2. Intergenic nuclear scaffold/matrix attachment and expression.** SARs (light blue) and MARs (dark blue) were mapped according to their distance from both the 5' and 3' ends of genes on chromosomes 14, 15, 17 and 18.
